# Supplementary material
Source: PubMed Central journal article supplement (PMC9729000)
Supplement: mmc1.pdf [file mmc1.pdf]

# THE LANCET

## Infectious Diseases

### Supplementary appendix

This appendix formed part of the original submission. We post it as supplied by the authors.

Supplement to: Uraki R, Ito M, Furusawa Y, et al. Humoral immune evasion of the omicron subvariants BQ.1.1 and XBB. *Lancet Infect Dis* 2022; published online Dec 7. [https://doi.org/10.1016/S1473-3099\(22\)00816-7](https://doi.org/10.1016/S1473-3099(22)00816-7).

**Humoral immune evasion of the Omicron Subvariants BQ.1.1 and XBB.**

**Supplementary Appendix**

**Table of Contents**

|                                                 |          |
|-------------------------------------------------|----------|
| <b>Supplementary Materials and Methods.....</b> | <b>2</b> |
| <b>Acknowledgements.....</b>                    | <b>3</b> |
| <b>Author Contributions.....</b>                | <b>3</b> |
| <b>Declaration of Interests.....</b>            | <b>3</b> |
| <b>Supplementary Tables</b>                     |          |
| <b>Table S1 .....</b>                           | <b>4</b> |
| <b>Table S2 .....</b>                           | <b>5</b> |
| <b>Table S3 .....</b>                           | <b>6</b> |
| <b>Table S4 .....</b>                           | <b>7</b> |
| <b>Supplementary References .....</b>           | <b>8</b> |

## **Supplementary Materials and Methods**

### **Cells.**

Vero E6-TMPRSS2-T2A-ACE2 cells (provided by Dr. Barney Graham, NIAID Vaccine Research Center) were cultured in Dulbecco's modified Eagle's medium (DMEM) containing 10% Fetal Calf Serum (FCS), 100 U/mL penicillin–streptomycin, and 10 µg/mL puromycin. VeroE6/TMPRSS2 (JCRB 1819) cells were propagated in the presence of 1 mg/ml geneticin (G418; Invivogen) and 5 µg/ml plasmocin prophylactic (Invivogen) in DMEM containing 10% FCS. Vero E6-TMPRSS2-T2A-ACE2 and VeroE6/TMPRSS2 cells were maintained at 37 °C with 5% CO<sub>2</sub>. The cells were regularly tested for mycoplasma contamination by using PCR, and confirmed to be mycoplasma-free.

### **Viruses.**

hCoV-19/Japan/TY41-796/2022 (Omicron BQ.1.1)<sup>1</sup>, hCoV-19/Japan/TY41-795/2022 (Omicron XBB), hCoV-19/Japan/UT-NCD1288-2N/2022 (Omicron BA.2)<sup>2</sup>, hCoV-19/Japan/TY41-702/2022 (Omicron BA.5)<sup>3</sup>, and SARS-CoV-2/UT-NC002-1T/Human/2020/Tokyo were propagated in VeroE6/TMPRSS2 cells.

All experiments with SARS-CoV-2 were performed in enhanced biosafety level 3 (BSL3) containment laboratories at the University of Tokyo and the National Institute of Infectious Diseases, Japan, which are approved for such use by the Ministry of Agriculture, Forestry, and Fisheries, Japan.

### **Clinical specimens.**

After informed consent was obtained, plasma specimens were collected from COVID-19 convalescent individuals and vaccinees. The research protocol was approved by the Research Ethics Review Committee of the Institute of Medical Science of the University of Tokyo (approval numbers: 2019–71–0201 and 2020-74-0226).

### **Focus reduction neutralisation test.**

Neutralisation activities of plasma were determined by using a focus reduction neutralisation test as previously described.<sup>4</sup> After the plasma samples were incubated at 56 °C for 1 h, the samples were serially diluted five-fold with DMEM containing 2% FCS in 96-well plates and mixed with 100–400 focus-forming units (FFU) of virus/well, followed by incubation at room temperature for 1 h. The plasma-virus mixture (50 µl) was then inoculated onto Vero E6-TMPRSS2-T2A-ACE2 cells in 96-well plates in duplicate and incubated for 1 h at 37 °C. An equal volume of 1.5% Methyl Cellulose 400 (FUJIFILM Wako Pure Chemical Corporation) in culture medium was then added to each well. The cells were incubated for 14–16 h at 37 °C and then fixed with formalin. After the formalin was removed, the cells were immunostained with a mouse monoclonal antibody against SARS-CoV1/2 nucleoprotein [clone 1C7C7 (Sigma-Aldrich)], followed by a horseradish peroxidase-labeled goat anti-mouse immunoglobulin (SeraCare Life Sciences or Jackson ImmunoResearch Laboratories Inc.). The infected cells were stained with TrueBlue Substrate (SeraCare Life Sciences) and then washed with distilled water. After cell drying, the focus numbers were quantified by using an ImmunoSpot S6 Analyzer, ImmunoCapture software, and BioSpot software (Cellular Technology). The results are expressed as the 50% focus reduction neutralisation titre (FRNT<sub>50</sub>). The FRNT<sub>50</sub> values were calculated by using GraphPad Prism (GraphPad Software).

**Acknowledgements**

We thank Susan Watson for scientific editing. We also thank Kyoko Yokota, Rie Onoue, Madoka Yoshikawa, and Naoko Mizutani for technical assistance. Vero E6-TMPRSS2-T2A-ACE2 cells were provided by Dr. Barney Graham, NIAID Vaccine Research Center.

**Author Contributions**

R.U.: conceptualization, formal analysis, validation, visualization, and writing the first draft. M. Ito.: data curation, formal analysis, and methodology. Y.F.: data curation. S. Yamayoshi: conceptualization and methodology. K.I-H.: resources and validation. E.A., M.S., M. Koga., T.T, S. Yamamoto, A.O, M. Kiso, Y.S-T., H.U., H.Y. : resources. M. Imai: conceptualization, supervision, formal analysis, validation, visualization, and writing the first draft. Y.K.: conceptualization, supervision, writing (review and editing), and funding acquisition. R.U., M. Ito, and Y.F. contributed equally.

**Declaration of Interests**

Y.K. has received unrelated funding support from Daiichi Sankyo Pharmaceutical, Toyama Chemical, Tauns Laboratories, Inc., Shionogi & Co. LTD, Otsuka Pharmaceutical, KM Biologics, Kyoritsu Seiyaku, Shinya Corporation, and Fuji Rebio. The remaining authors declare that they have no competing interests.

**Table S1. Amino acid Substitutions in the clinical isolates of BA.2, BA.5, BQ.1.1, and XBB used in this study**

| Protein         | Position      | Virus (Pan-ge lineage) |                                       |                                    |                                      |                                    |     |
|-----------------|---------------|------------------------|---------------------------------------|------------------------------------|--------------------------------------|------------------------------------|-----|
|                 |               | Early SARS-CoV-2 (A)   | hCoV-19/Japan/IT-NCDC1288-2022 (BA.2) | hCoV-19/Japan/1Y41-702/2022 (BA.5) | hCoV-19/Japan/1Y4-1796/2022 (BQ.1.1) | hCoV-19/Japan/1Y4-41795/2022 (XBB) |     |
|                 |               |                        |                                       |                                    |                                      |                                    |     |
| ORF1a           | 47            | Lys                    | Lys                                   | Lys                                | Lys                                  | Arg                                |     |
|                 | 135           | Ser                    | Arg                                   | Arg                                | Arg                                  | Arg                                |     |
|                 | 556           | Gln                    | Gln                                   | Lys                                | Lys                                  | Gln                                |     |
|                 | 842           | Thr                    | Ile                                   | Ile                                | Ile                                  | Ile                                |     |
|                 | 1387          | Gly                    | Ser                                   | Ser                                | Ser                                  | Ser                                |     |
|                 | 3027          | Leu                    | Phe                                   | Phe                                | Phe                                  | Phe                                |     |
|                 | 3090          | Thr                    | Ile                                   | Ile                                | Ile                                  | Ile                                |     |
|                 | 3201          | Leu                    | Phe                                   | Leu                                | Leu                                  | Phe                                |     |
|                 | 3255          | Thr                    | Ile                                   | Ile                                | Ile                                  | Ile                                |     |
|                 | 3395          | Pro                    | His                                   | His                                | His                                  | His                                |     |
|                 | 3650          | Phe                    | Phe                                   | Leu (85%)                          | Phe                                  | Phe                                |     |
|                 | 3675          | Ser                    | del                                   | del                                | del                                  | del                                |     |
|                 | 3676          | Gly                    | del                                   | del                                | del                                  | del                                |     |
|                 | 3677          | Phe                    | del                                   | del                                | del                                  | del                                |     |
|                 | 3730          | Ala                    | Ala                                   | Ala                                | Ala                                  | Val(22%)                           |     |
|                 | 3753          | Phe                    | Val(20%)                              | Phe                                | Phe                                  | Phe                                |     |
|                 | 3829          | Leu                    | Leu                                   | Leu                                | Phe                                  | Leu                                |     |
|                 | 4391          | Leu                    | Phe(19%)                              | Leu                                | Leu                                  | Leu                                |     |
|                 | ORF1b         | 264                    | Tyr                                   | Tyr                                | Tyr                                  | His                                | Tyr |
|                 |               | 314                    | Pro                                   | Leu                                | Leu                                  | Leu                                | Leu |
| 659             |               | Met                    | Met                                   | Met                                | Met                                  | Ile                                |     |
| 662             |               | Gly                    | Val                                   | Gly                                | Gly                                  | Ser                                |     |
| 959             |               | Ser                    | Pro                                   | Ser                                | Ser                                  | Pro                                |     |
| 1156            |               | Met                    | Met                                   | Ile                                | Ile                                  | Met                                |     |
| 1161            |               | Pro                    | Ser(27%)                              | Pro                                | Pro                                  | Pro                                |     |
| 1191            |               | Asn                    | Asn                                   | Asn                                | Ser                                  | Asn                                |     |
| 1315            |               | Arg                    | Cys                                   | Cys                                | Cys                                  | Cys                                |     |
| 1566            |               | Ile                    | Val                                   | Val                                | Val                                  | Val                                |     |
| 2163            |               | Thr                    | Ile                                   | Ile                                | Ile                                  | Ile                                |     |
| 2513            |               | Ala                    | Val(18%)                              | Ala                                | Ala                                  | Ala                                |     |
| NTD (13-304)    |               | 19                     | Thr                                   | Ile                                | Ile                                  | Ile                                | Ile |
|                 |               | 24                     | Leu                                   | del                                | del                                  | del                                | del |
|                 |               | 25                     | Pro                                   | del                                | del                                  | del                                | del |
|                 | 26            | Pro                    | del                                   | del                                | del                                  | del                                |     |
|                 | 27            | Ala                    | Ser                                   | Ser                                | Ser                                  | Ser                                |     |
|                 | 68            | His                    | His                                   | del                                | del                                  | His                                |     |
|                 | 70            | Val                    | Val                                   | del                                | del                                  | Val                                |     |
|                 | 83            | Val                    | Val                                   | Val                                | Val                                  | Ala                                |     |
|                 | 142           | Gly                    | Asp                                   | Asp                                | Asp                                  | Asp                                |     |
|                 | 145           | Tyr                    | Tyr                                   | Tyr                                | Tyr                                  | del                                |     |
|                 | 146           | His                    | His                                   | His                                | His                                  | Gln                                |     |
|                 | 183           | Gln                    | Gln                                   | Gln                                | Gln                                  | Gln                                |     |
|                 | 213           | Val                    | Gly                                   | Gly                                | Gly                                  | Gln                                |     |
|                 | 252           | Gly                    | Gly                                   | Gly                                | Gly                                  | Val                                |     |
|                 | RBD (331-527) | 339                    | Gly                                   | Asp                                | Asp                                  | Asp                                | His |
|                 |               | 346                    | Arg                                   | Arg                                | Arg                                  | Thr                                | Thr |
|                 |               | 368                    | Leu                                   | Leu                                | Leu                                  | Leu                                | Ile |
|                 |               | 371                    | Ser                                   | Phe                                | Phe                                  | Phe                                | Phe |
|                 |               | 373                    | Ser                                   | Pro                                | Pro                                  | Pro                                | Pro |
|                 |               | 375                    | Ser                                   | Phe                                | Phe                                  | Phe                                | Phe |
| 376             |               | Thr                    | Ala                                   | Ala                                | Ala                                  | Ala                                |     |
| 405             |               | Asp                    | Asn                                   | Asn                                | Asn                                  | Asn                                |     |
| 408             |               | Arg                    | Ser                                   | Ser                                | Ser                                  | Ser                                |     |
| 417             |               | Lys                    | Asn                                   | Asn                                | Asn                                  | Asn                                |     |
| 440             |               | Asn                    | Lys                                   | Lys                                | Lys                                  | Lys                                |     |
| 444             |               | Lys                    | Lys                                   | Lys                                | Thr                                  | Lys                                |     |
| 445             |               | Val                    | Val                                   | Val                                | Val                                  | Pro                                |     |
| 446             |               | Gly                    | Gly                                   | Gly                                | Gly                                  | Ser                                |     |
| 452             |               | Leu                    | Leu                                   | Arg                                | Arg                                  | Leu                                |     |
| 460             |               | Asn                    | Asn                                   | Asn                                | Lys                                  | Lys                                |     |
| 477             |               | Ser                    | Asn                                   | Asn                                | Asn                                  | Asn                                |     |
| 478             |               | Thr                    | Lys                                   | Lys                                | Lys                                  | Lys                                |     |
| 484             |               | Gln                    | Ala                                   | Ala                                | Ala                                  | Ala                                |     |
| 486             |               | Phe                    | Phe                                   | Val                                | Val                                  | Ser                                |     |
| 490             | Phe           | Phe                    | Phe                                   | Phe                                | Ser                                  |                                    |     |
| 493             | Gln           | Arg                    | Gln                                   | Gln                                | Gln                                  |                                    |     |
| 498             | Gln           | Arg                    | Arg                                   | Arg                                | Arg                                  |                                    |     |
| 501             | Asn           | Tyr                    | Tyr                                   | Tyr                                | Tyr                                  |                                    |     |
| SD1/2 (528-684) | 505           | Tyr                    | His                                   | His                                | His                                  | His                                |     |
|                 | 614           | Asp                    | Gly                                   | Gly                                | Gly                                  | Gly                                |     |
|                 | 655           | His                    | Tyr                                   | Tyr                                | Tyr                                  | Tyr                                |     |
|                 | 679           | Asn                    | Lys                                   | Lys                                | Lys                                  | Lys                                |     |
| S2 (685-1210)   | 681           | Pro                    | His                                   | His                                | His                                  | His                                |     |
|                 | 764           | Asn                    | Lys                                   | Lys                                | Lys                                  | Lys                                |     |
|                 | 796           | Asp                    | Tyr                                   | Tyr                                | Tyr                                  | Tyr                                |     |
|                 | 954           | Gln                    | His                                   | His                                | His                                  | His                                |     |
| 969             | Asn           | Lys                    | Lys                                   | Lys                                | Lys                                  |                                    |     |
| ORF3a           | 223           | Thr                    | Ile                                   | Ile                                | Ile                                  | Ile                                |     |
| E               | 9             | Thr                    | Ile                                   | Ile                                | Ile                                  | Ile                                |     |
|                 | 11            | Thr                    | Thr                                   | Thr                                | Thr                                  | Ala                                |     |
| M               | 3             | Asp                    | Asp                                   | Asn                                | Asn                                  | Asp                                |     |
|                 | 19            | Gln                    | Gln                                   | Gln                                | Gln                                  | Gln                                |     |
| ORF6            | 63            | Ala                    | Thr                                   | Thr                                | Thr                                  | Thr                                |     |
|                 | 61            | Asp                    | Leu                                   | Asp                                | Asp                                  | Leu                                |     |
| ORF7b           | 10            | Pro                    | Ser                                   | Pro                                | Pro                                  | Pro                                |     |
|                 | 27            | Gln                    | del                                   | Gln                                | Gln                                  | Gln                                |     |
|                 | 28            | Asn                    | del                                   | Asn                                | Asn                                  | Asn                                |     |
|                 | 29            | Ala                    | del                                   | Ala                                | Ala                                  | Ala                                |     |
| N               | 13            | Pro                    | Leu                                   | Leu                                | Leu                                  | Leu                                |     |
|                 | 31            | Gln                    | del                                   | del                                | del                                  | del                                |     |
|                 | 32            | Arg                    | del                                   | del                                | del                                  | del                                |     |
|                 | 33            | Ser                    | del                                   | del                                | del                                  | del                                |     |
|                 | 136           | Gln                    | Gln                                   | Asp                                | Asp                                  | Gln                                |     |
|                 | 203           | Arg                    | Lys                                   | Lys                                | Lys                                  | Lys                                |     |
|                 | 204           | Gly                    | Arg                                   | Arg                                | Arg                                  | Arg                                |     |
| 413             | Ser           | Arg                    | Arg                                   | Arg                                | Arg                                  |                                    |     |

Substitutions are shown relative to the reference strain Wuhan/Hu-1/2019. The spike protein is composed of two subunits, S1 and S2. ORF, open reading frame; SP, signal peptide; NTD, N-terminal domain; RBD, receptor-binding domain; SD1/2, subdomain 1 and 2; E, Envelope; M, Membrane; and N, Nucleocapsid. del; deletion

**Table S2. Neutralising antibody titres of human plasma obtained from individuals immunized with three doses of BNT162b2 or mRNA-1273 vaccine**

| Sample ID  | Gender | Age | Documented SARS-CoV-2 infection | Vaccine type | Days post-vaccination | FRNT50: 50% focus reduction neutralisation titre |                                  |                             |                             |                             |
|------------|--------|-----|---------------------------------|--------------|-----------------------|--------------------------------------------------|----------------------------------|-----------------------------|-----------------------------|-----------------------------|
|            |        |     |                                 |              |                       | (A)                                              | Omicron/BA.2                     | Omicron/BA.5                | Omicron/BQ.1.1              | Omicron/XBB                 |
|            |        |     |                                 |              |                       | SARS-CoV-2/UT-NC002-1T/Human/2020/Tokyo          | hCoV-19/Japan/UT-NCD1288-2N-2022 | hCoV-19/Japan/TY41-702/2022 | hCoV-19/Japan/TY41-796/2022 | hCoV-19/Japan/TY41-795/2022 |
| HP(H)- 004 | F      | 50  | No                              | BNT162b2x 3  | 183                   | 426.5                                            | 32.8                             | 28.7                        | <10                         | <10                         |
| HP(H)- 019 | F      | 57  | No                              | BNT162b2x 3  | 182                   | 147.7                                            | 32                               | 10.2                        | <10                         | <10                         |
| HP(H)- 026 | F      | 25  | No                              | BNT162b2x 3  | 181                   | 335.9                                            | 30.5                             | 15.1                        | <10                         | <10                         |
| HP(H)- 065 | F      | 40  | No                              | BNT162b2x 3  | 181                   | 166.9                                            | 11                               | <10                         | <10                         | <10                         |
| HP(H)- 106 | F      | 29  | No                              | BNT162b2x 3  | 182                   | 620.1                                            | 156.3                            | 49.3                        | <10                         | <10                         |
| HP(H)- 115 | F      | 48  | No                              | BNT162b2x 3  | 182                   | 162.1                                            | 17.2                             | <10                         | <10                         | <10                         |
| HP(H)- 131 | M      | 61  | No                              | BNT162b2x 3  | 183                   | 172.2                                            | 19.4                             | <10                         | <10                         | <10                         |
| HP(H)- 168 | M      | 49  | No                              | BNT162b2x 3  | 182                   | 86.6                                             | <10                              | <10                         | <10                         | <10                         |
| HP(H)- 173 | M      | 39  | No                              | BNT162b2x 3  | 180                   | 74.3                                             | <10                              | <10                         | <10                         | <10                         |
| HP(H)- 181 | M      | 54  | No                              | BNT162b2x 3  | 182                   | 607.9                                            | 15.4                             | <10                         | <10                         | <10                         |
| HP(H)- 182 | F      | 51  | No                              | BNT162b2x 3  | 176                   | 411.9                                            | 64.9                             | 13.5                        | <10                         | <10                         |
| HP(H)- 194 | M      | 49  | No                              | BNT162b2x 3  | 182                   | 86.6                                             | 30.7                             | 14.4                        | <10                         | <10                         |
| HP(H)- 221 | F      | 55  | No                              | BNT162b2x 3  | 181                   | 66                                               | <10                              | <10                         | <10                         | <10                         |
| HP(H)- 303 | M      | 50  | No                              | BNT162b2x 3  | 188                   | 135.4                                            | 15.8                             | <10                         | <10                         | <10                         |
| AG- 001    | F      | 54  | No                              | mRNA-1273x 3 | 189                   | 843.2                                            | 284.8                            | 235.2                       | 33.7                        | 73.7                        |
| AG- 002    | F      | 48  | No                              | mRNA-1273x 3 | 187                   | 353.1                                            | <10                              | <10                         | <10                         | <10                         |
| AG- 007    | F      | 53  | No                              | mRNA-1273x 3 | 183                   | 721.6                                            | 60.9                             | 38.7                        | <10                         | <10                         |
| AG- 008    | F      | 57  | No                              | mRNA-1273x 3 | 183                   | 250.7                                            | 22.6                             | 27.7                        | <10                         | <10                         |
| AG- 010    | M      | 61  | No                              | mRNA-1273x 3 | 184                   | 585.2                                            | 297.8                            | 278.6                       | 122.3                       | 42.2                        |
| AG- 011    | F      | 55  | No                              | mRNA-1273x 3 | 185                   | 647.5                                            | 74.7                             | 48.1                        | 13.1                        | <10                         |

**Table S3. Neutralising antibody titres of human plasma obtained from individuals immunized with four doses of BNT162b2 or mRNA-1273 vaccine**

| Sample ID | Gender | Age | Documented SARS-CoV-2 infection | Vaccine type               | Days post-vaccination | FRNT50: 50% focus reduction neutralisation titre |                                  |                             |                             |                             |
|-----------|--------|-----|---------------------------------|----------------------------|-----------------------|--------------------------------------------------|----------------------------------|-----------------------------|-----------------------------|-----------------------------|
|           |        |     |                                 |                            |                       | (A)                                              | Omicron/BA.2                     | Omicron/BA.5                | Omicron/BQ.1.1              | Omicron/XBB                 |
|           |        |     |                                 |                            |                       | SARS-CoV-2/UT-NC002-1T/Human/2020/Tokyo          | hCoV-19/Japan/UT-NCD1288-2N-2022 | hCoV-19/Japan/TY41-702/2022 | hCoV-19/Japan/TY41-796/2022 | hCoV-19/Japan/TY41-795/2022 |
| HP(H)-032 | M      | 39  | No                              | BNT162b2x 3, mRNA-1273 x 1 | 53                    | 629                                              | 58.9                             | 47.2                        | 10                          | <10                         |
| HP(H)-058 | F      | 58  | No                              | BNT162b2x 3, mRNA-1273 x 1 | 48                    | 4108.2                                           | 836.7                            | 632.9                       | 158.9                       | 97.5                        |
| HP(H)-088 | F      | 46  | No                              | BNT162b2x 3, mRNA-1273 x 1 | 43                    | 844.2                                            | 125.8                            | 59.2                        | 24.7                        | 21.6                        |
| HP(H)-113 | M      | 62  | No                              | BNT162b2x 3, mRNA-1273 x 1 | 41                    | 972.2                                            | 63                               | 64.9                        | <10                         | <10                         |
| HP(H)-158 | F      | 29  | No                              | BNT162b2x 3, mRNA-1273 x 1 | 41                    | 356.3                                            | 19.9                             | <10                         | <10                         | <10                         |
| HP(H)-182 | F      | 52  | No                              | BNT162b2x 4                | 54                    | 1581.7                                           | 191.7                            | 86.6                        | 29.8                        | 14.9                        |
| HP(H)-183 | F      | 47  | No                              | BNT162b2x 3, mRNA-1273 x 1 | 44                    | 728.2                                            | 108.4                            | 72                          | <10                         | <10                         |
| HP(H)-185 | F      | 48  | No                              | BNT162b2x 3, mRNA-1273 x 1 | 50                    | 1275.5                                           | 203.8                            | 129.4                       | 35.8                        | 13.7                        |
| HP(H)-189 | F      | 57  | No                              | BNT162b2x 4                | 33                    | 598.8                                            | 83.7                             | 60                          | 12.7                        | <10                         |
| HP(H)-198 | F      | 33  | No                              | BNT162b2x 3, mRNA-1273 x 1 | 45                    | 590.3                                            | 39.5                             | 21.6                        | <10                         | <10                         |
| HP(H)-220 | M      | 34  | No                              | BNT162b2x 3, mRNA-1273 x 1 | 44                    | 360.4                                            | 41.7                             | 13                          | <10                         | <10                         |
| HP(H)-228 | F      | 49  | No                              | BNT162b2x 3, mRNA-1273 x 1 | 51                    | 595.6                                            | 178.2                            | 102.6                       | 21.8                        | <10                         |
| HP(H)-241 | F      | 62  | No                              | BNT162b2x 4                | 57                    | 659.2                                            | 116.2                            | 91                          | <10                         | 10                          |
| HP(H)-250 | F      | 35  | No                              | BNT162b2x 3, mRNA-1273 x 1 | 49                    | 1741.7                                           | 300.5                            | 335.6                       | 42.9                        | 32.7                        |
| HP(H)-255 | F      | 51  | No                              | BNT162b2x 3, mRNA-1273 x 1 | 42                    | 892.1                                            | 78.1                             | 39.9                        | <10                         | <10                         |
| HP(H)-264 | M      | 43  | No                              | BNT162b2x 3, mRNA-1273 x 1 | 41                    | 901                                              | 34.7                             | 65.7                        | <10                         | <10                         |
| HP(H)-282 | M      | 43  | No                              | BNT162b2x 3, mRNA-1273 x 1 | 48                    | 256.6                                            | 36.5                             | 35.5                        | <10                         | <10                         |
| HP(H)-297 | M      | 56  | No                              | BNT162b2x 3, mRNA-1273 x 1 | 45                    | 1184.8                                           | 253.9                            | 154.7                       | 64.9                        | 72.8                        |
| HP(H)-299 | F      | 53  | No                              | BNT162b2x 4                | 53                    | 202.9                                            | 21                               | 25.4                        | <10                         | <10                         |
| HP(H)-303 | M      | 51  | No                              | BNT162b2x 4                | 49                    | 349.6                                            | 52.6                             | 41.4                        | <10                         | <10                         |

**Table S4. Neutralising antibody titres of human plasma obtained from individuals who were infected with Omicron BA.2 after three doses of COVID-19 vaccines**

| Sample ID   | Gender | Age | Documented SARS-CoV-2 infection | Vaccine type                | Days post-onset | FRNT50: 50% focus reduction neutralisation titre |                                  |                             |                             |                             |
|-------------|--------|-----|---------------------------------|-----------------------------|-----------------|--------------------------------------------------|----------------------------------|-----------------------------|-----------------------------|-----------------------------|
|             |        |     |                                 |                             |                 | (A)                                              | Omicron/BA.2                     | Omicron/BA.5                | Omicron/BQ.1.1              | Omicron/XBB                 |
|             |        |     |                                 |                             |                 | SARS-CoV-2/UT-NC002-1T/Human/2020/Tokyo          | hCoV-19/Japan/UT-NCD1288-2N-2022 | hCoV-19/Japan/TY41-702/2022 | hCoV-19/Japan/TY41-796/2022 | hCoV-19/Japan/TY41-795/2022 |
| HPCo-383    | F      | 56  | Yes (BA.2)                      | mRNA-1273 x 2, BNT162b2 x 1 | 29              | 425.6                                            | 46.4                             | 51.8                        | <10                         | <10                         |
| HP-S(H)0377 | M      | 29  | Yes (BA.2)                      | BNT162b2x 3                 | 44              | 499.4                                            | 227.7                            | 103.2                       | 30.2                        | 13.6                        |
| HP-S(H)0380 | M      | 22  | Yes (BA.2)                      | BNT162b2x 3                 | 42              | 1452.2                                           | 262.9                            | 194.2                       | 16.9                        | 13.9                        |
| HP-S(H)0381 | M      | 22  | Yes (BA.2)                      | BNT162b2x 3                 | 44              | 650.4                                            | 218.6                            | 161.5                       | <10                         | 10                          |
| HP-S(H)0382 | M      | 21  | Yes (BA.2)                      | BNT162b2x 3                 | 44              | 4222.7                                           | 656.6                            | 399.2                       | 94.4                        | 25.1                        |
| HP-S(H)0383 | M      | 18  | Yes (BA.2)                      | BNT162b2x 3                 | 42              | 648.9                                            | 377.7                            | 258.4                       | 76.9                        | 14.9                        |
| HP-S(H)0882 | M      | 23  | Yes (BA.2)                      | BNT162b2x 3                 | 89              | 601.7                                            | 156.5                            | 92.7                        | <10                         | <10                         |
| HP-S(H)0883 | M      | 24  | Yes (BA.2)                      | BNT162b2x 3                 | 84              | 3532.7                                           | 595.1                            | 219.5                       | 66.4                        | 28.6                        |
| HP-S(H)0888 | M      | 21  | Yes (BA.2)                      | BNT162b2x 3                 | 89              | 3813.5                                           | 734.8                            | 300                         | 72.5                        | 36.7                        |
| HP-S(H)1056 | M      | 22  | Yes (BA.2)                      | BNT162b2x 3                 | 42              | 3448.3                                           | 1141.6                           | 417.2                       | 288.1                       | 252.7                       |



### Supplementary References

1. Imai M, Ito M, Kiso M, et al. Efficacy of Antiviral Agents against Omicron BQ.1.1 and XBB Subvariants. *N Engl J Med. in press*
2. Takashita E, Kinoshita N, Yamayoshi S, et al. Efficacy of Antiviral Agents against the SARS-CoV-2 Omicron Subvariant BA.2. *N Engl J Med. 2022;386:1475-1477.*
3. Takashita E, Yamayoshi S, Simon V, et al. Efficacy of Antibodies and Antiviral Drugs against Omicron BA.2.12.1, BA.4, and BA.5 Subvariants. *N Engl J Med. 2022;387:468-470.*
4. Vanderheiden A, Edara VV, Floyd K, et al. Development of a Rapid Focus Reduction Neutralization Test Assay for Measuring SARS-CoV-2 Neutralizing Antibodies. *Current Protocols in Immunology. 2020;131:e116.*
